# Supplementary material
Source: PubMed Central journal article supplement (PMC8350422)
Supplement: mmc4.pdf [file mmc4.pdf]

**A**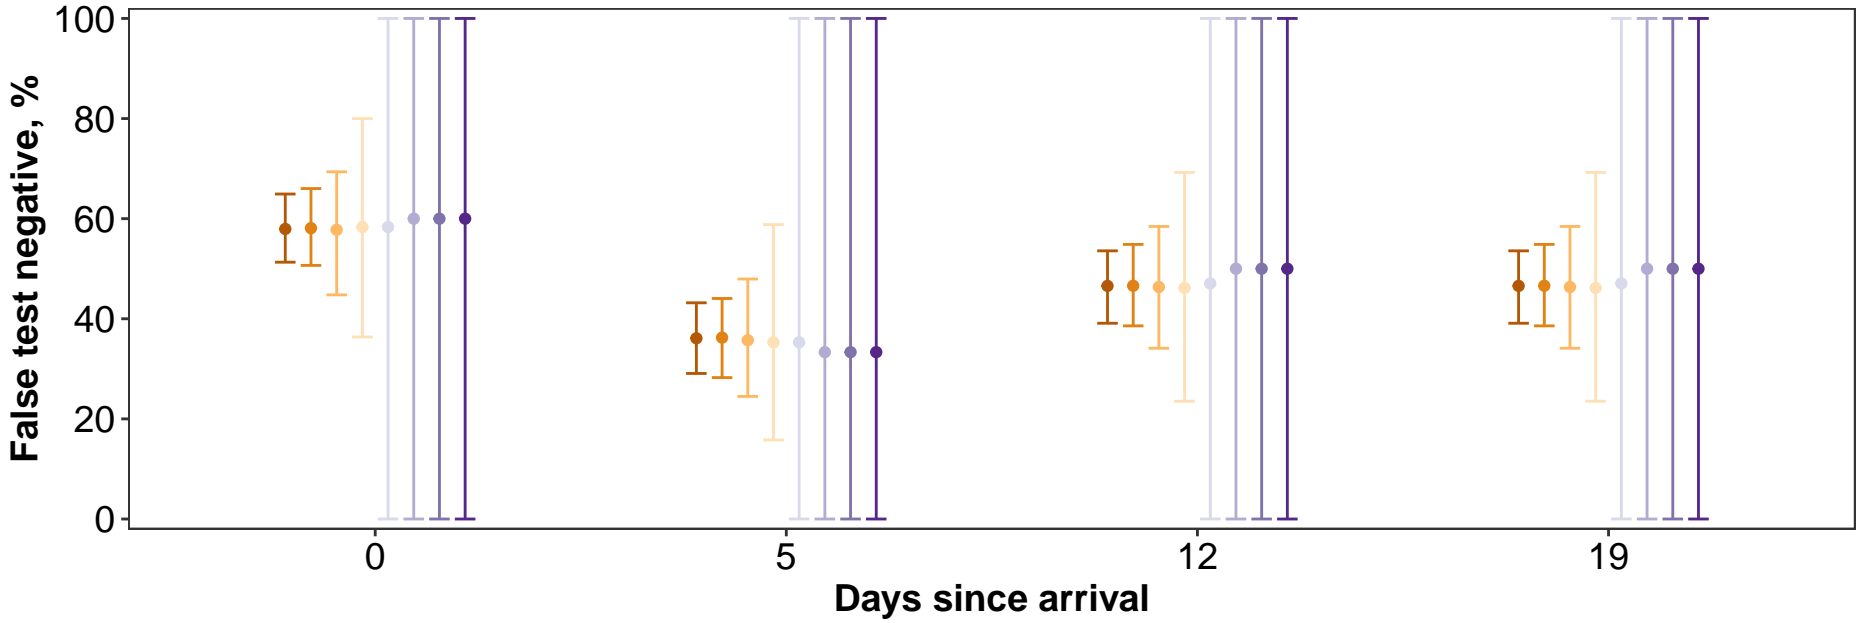**B**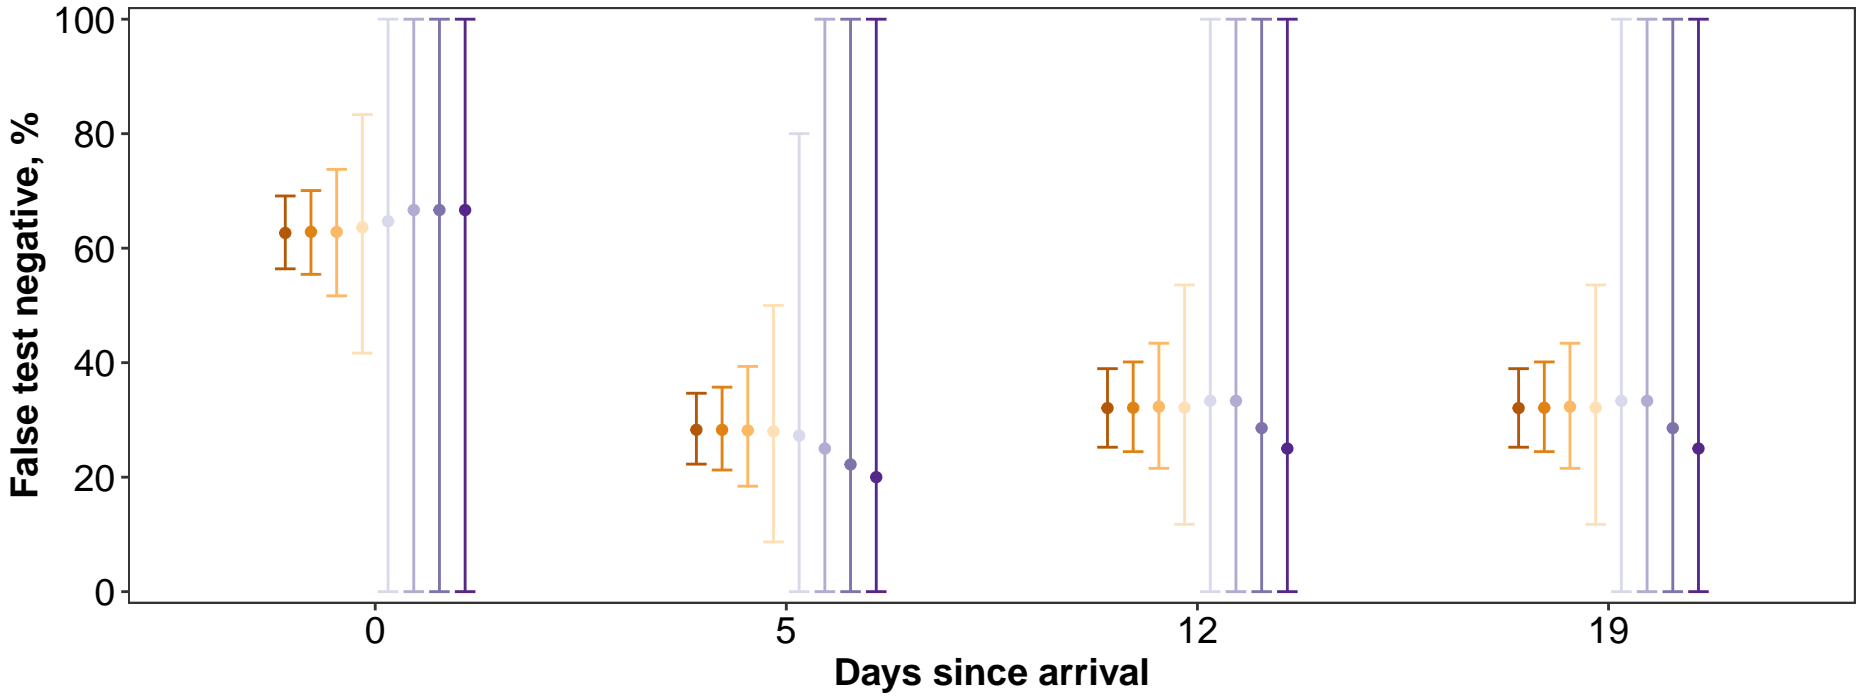

Country/Region

- Philippines
- United States of America
- Korea
- Singapore
- United Kingdom
- Japan
- Australia
- Taiwan
